# Supplementary material for: Bi–C monolayer as a promising 2D anode material for Li, Na, and K-ion batteries
Source: Royal Society of Chemistry journal article supplement (doi:10.1039/d2cp04712h), 2023-01-01
Supplement: d2cp04712h1.pdf [file d2cp04712h1.pdf]

## Supplementary Information

### Bi-C sheet as auspicious 2D anode material for Li, Na, and K-ion batteries

Awais Ghani <sup>a</sup>, Shehzad Ahmed <sup>b</sup>, Adil Murtaza <sup>a</sup>, Imran Muhammad <sup>c</sup>, Wasif ur Rehman <sup>d</sup>,  
Chao Zhou <sup>a</sup>, Wen Liang Zuo <sup>a</sup>, and Sen Yang\* <sup>a</sup>

<sup>a</sup> MOE Key Laboratory for Non-equilibrium Synthesis and Modulation of Condensed Matter, Key Laboratory of Advanced Functional Materials and Mesoscopic Physics of Shaanxi Province, School of Physics, Xi'an Jiaotong University, 710049, Xi'an, Shaanxi, P. R China

<sup>b</sup> College of Physics and Optoelectronic Engineering, Shenzhen University, Guangdong 518060, P. R China

<sup>c</sup> Department of Chemistry and Guangdong Provincial Key Laboratory of Catalytic Chemistry, Southern University of Science and Technology, Shenzhen, Guangdong 518055, China

<sup>d</sup> MOE Key Laboratory of Thermo-Fluid Science and Engineering, School of Energy and Power Engineering, Xi'an Jiaotong University, Xi'an, Shaanxi, P. R China

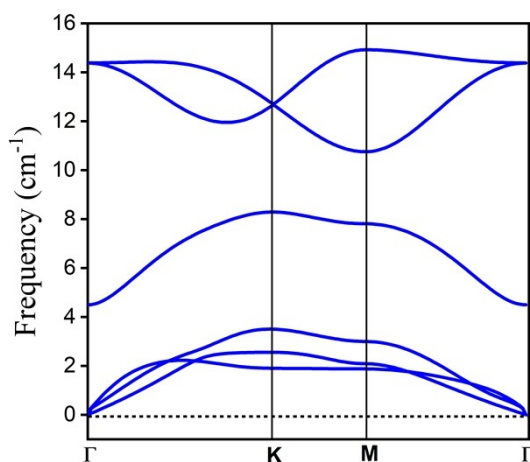

Fig. S1. Phonon spectrum of Bi-C monolayer.

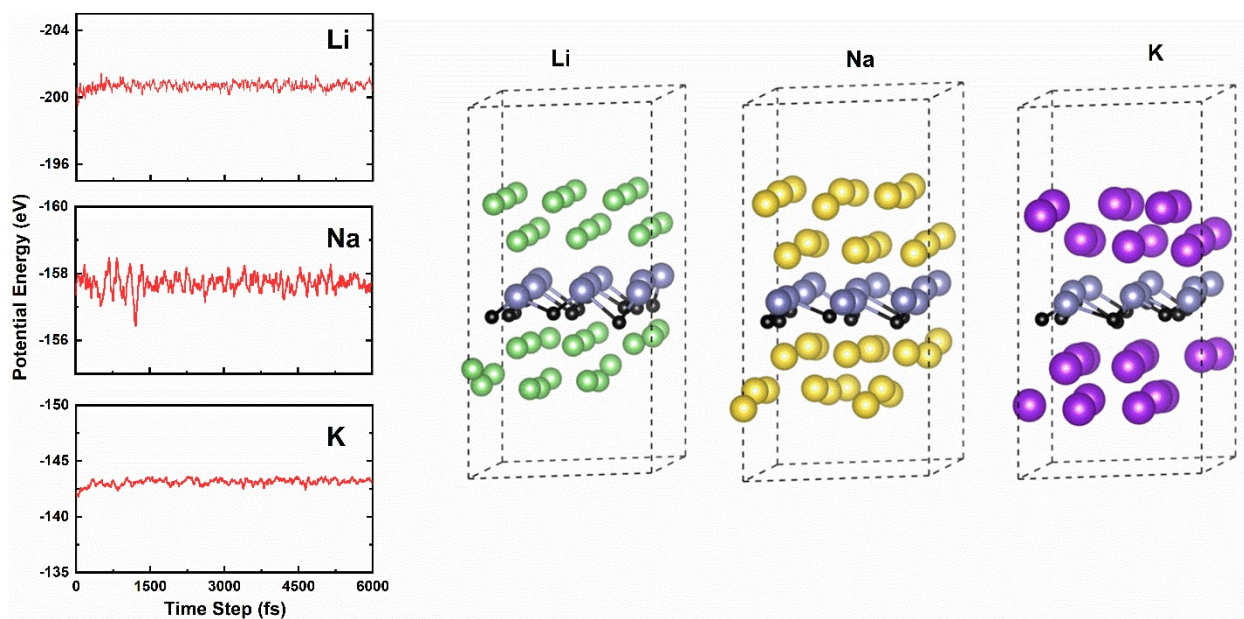

Fig. S2. The ab-initio molecular dynamics calculations of Bi-C monolayer with highest capacity of adatoms at 300 K.
